# Supplementary material for: A new metric to control nucleation and grain size distribution in hybrid organic–inorganic perovskites by tuning the dielectric constant of the antisolvent
Source: Royal Society of Chemistry journal article supplement (doi:10.1039/d0ta12364a), 2021-01-01
Supplement: d0ta12364a1.pdf [file d0ta12364a1.pdf]

## Electronic Supplementary Information

# A New Metric to Control Nucleation and Grain Size Distribution in Hybrid Organic-Inorganic Perovskites by Tuning the Dielectric Constant of the Antisolvent

Blaire A. Sorenson,<sup>a‡</sup> Lucy U. Yoon,<sup>b‡</sup> Eric Holmgren,<sup>b</sup> Joshua J. Choi,<sup>b</sup> Paulette Clancy<sup>a</sup>

## 1 Solvent-Antisolvent Interactions

| $\epsilon$ | DMF-ATS | Binding Energy | Same solvents | Binding Energy |
|------------|---------|----------------|---------------|----------------|
| 36.7       | DMF-DMF | -1.95          | DMF-DMF       | -1.95          |
| 28.54      | DMF-DCM | -2.86          | DCM-DCM       | -2.29          |
| 26.64      | DMF-THF | -0.80          | THF-THF       | -1.92          |
| 24.38      | DMF-CB  | -3.45          | CB-CB         | -2.44          |
| 23.73      | DMF-ANS | -3.60          | ANS-ANS       | -3.88          |
| 22.66      | DMF-TOL | -3.96          | TOL-TOL       | -3.46          |

**Table 1** Intermolecular binding energies (in kcal/mol) of solvent pairs used in perovskite precursor solution processing as a function of the dielectric constant (column 1), arranged in decreasing value of the pair. Columns 2 and 3: Binding energy results for DMF interacting with five different antisolvents. Columns 4 and 5: Binding energy results for same-solvent pairs, for comparison.

<sup>a</sup> Johns Hopkins University, Department of Chemical and Biomolecular Engineering, 3400 North Charles Street, Baltimore MD 21218; Tel: 410-516-7170; E-mail: bsorens4@jhu.edu

<sup>b</sup> University of Virginia, Department of Chemical Engineering, Thornton Hall, P.O. Box 400259, Charlottesville, VA 22904-4259; Tel: 434-924-3072; E-mail: jjc6z@virginia.edu

‡These authors contributed equally to this work

## 2 Solvent-HOIP Precursor Interactions

| $\epsilon$ | Solvent-MAPbI <sub>3</sub> Interaction | Binding Energy | MA <sup>+</sup> -PbI <sub>3</sub> -solvent Interaction | Binding Energy |
|------------|----------------------------------------|----------------|--------------------------------------------------------|----------------|
| 36.7       | DMF-MAPbI <sub>3</sub>                 | -6.58          | MA <sup>+</sup> – (PbI <sub>3</sub> DMF)               | -6.70          |
| 28.54      | DCM-MAPbI <sub>3</sub>                 | -4.07          | MA <sup>+</sup> – (PbI <sub>3</sub> DCM)               | -6.72          |
| 26.64      | THF-MAPbI <sub>3</sub>                 | -7.33          | MA <sup>+</sup> – (PbI <sub>3</sub> THF)               | -7.74          |
| 24.38      | CB-MAPbI <sub>3</sub>                  | -7.38          | MA <sup>+</sup> – (PbI <sub>3</sub> CB)                | -7.60          |
| 23.73      | ANS-MAPbI <sub>3</sub>                 | -8.59          | MA <sup>+</sup> – (PbI <sub>3</sub> ANS)               | -7.86          |
| 22.66      | TOL-MAPbI <sub>3</sub>                 | -8.88          | MA <sup>+</sup> – (PbI <sub>3</sub> TOL)               | -8.19          |

**Table 2** Comparison of the intermolecular binding energy of a variety of solvents to a MAPbI<sub>3</sub> monomer (column 3) to the binding energy of a MA<sup>+</sup> cation to a complex formed by PbI<sub>3</sub><sup>−</sup> and a solvent molecule (column 5) in the perovskite precursor solution. Intermolecular binding energies are given in kcal/mol.

### 3 Effect of Changing $\text{PbI}_2$ Concentration

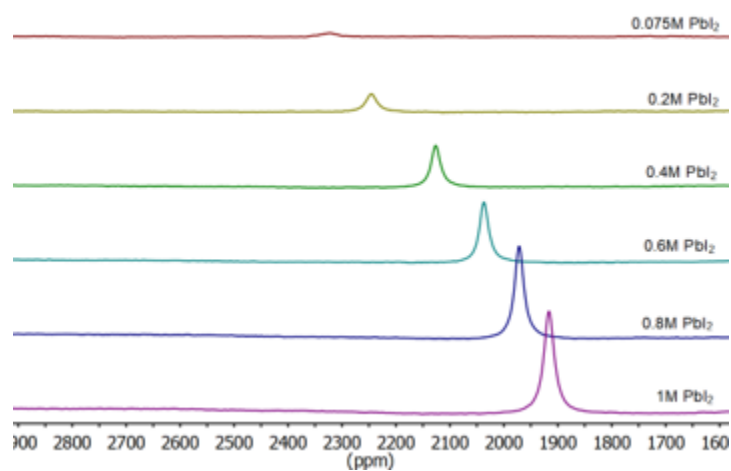

**Fig. 1** Solution-state  $^{207}\text{Pb}$ -NMR spectra for various concentrations of  $\text{PbI}_2$  ranging from 0.075 M to 1 M. An upfield shift and stronger peak intensity were observed with increasing  $\text{PbI}_2$  concentration.

## 4 Effect of Changing MAI Concentration

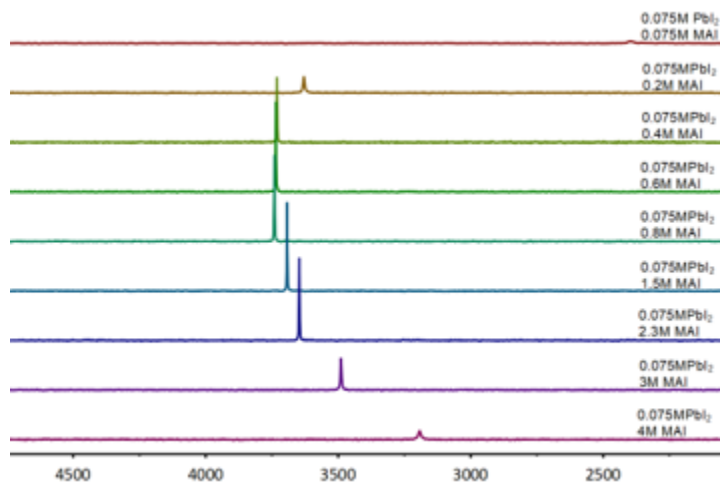

**Fig. 2** Solution-state  $^{207}\text{Pb}$ -NMR spectra of 0.075 M  $\text{PbI}_2$  with varying MAI concentration from 0.075 M (equimolar) to 4 M. Initially, a downfield shift was observed until the molar ratio is 0.075 M  $\text{PbI}_2$ :0.8 M MAI; MAI concentrations greater than 0.8 M resulted in an upfield shift. The presence of considerable excess MAI also yielded a significant decrease in peak intensity.

## 5 Effect of Antisolvents of Varying Dielectric Constant and Increasing MAI Concentration

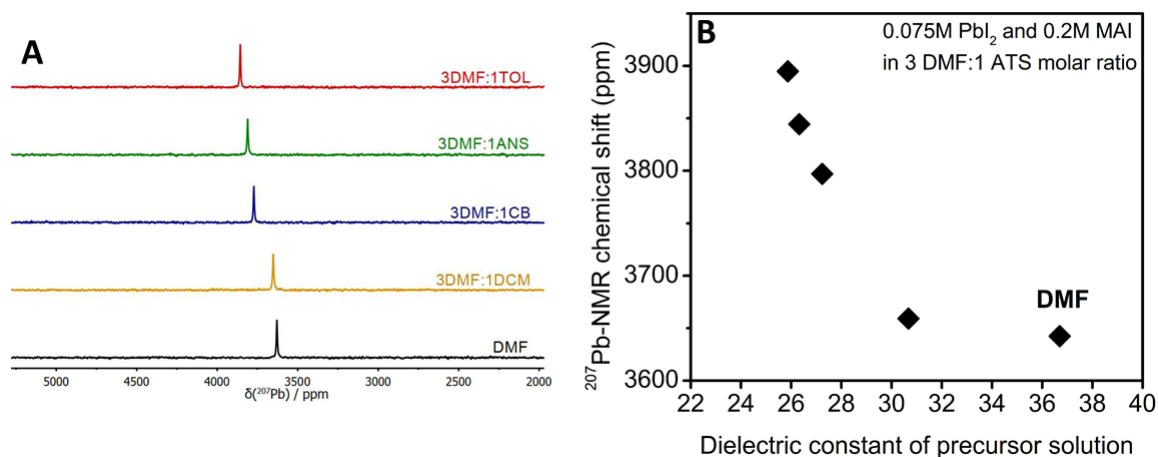

**Fig. 3** (A) Solution-state  $^{207}\text{Pb}$ -NMR spectra of 0.075 M  $\text{PbI}_2$  and 0.2 M MAI in pure DMF and in a 3:1 molar ratio of DMF to antisolvents with varying dielectric constants. (B)  $^{207}\text{Pb}$ -NMR chemical shift as a function of the dielectric constant of the precursor solution. A clear trend in downfield shift is observed when an antisolvent with a lower dielectric constant is incorporated into the precursor solution.

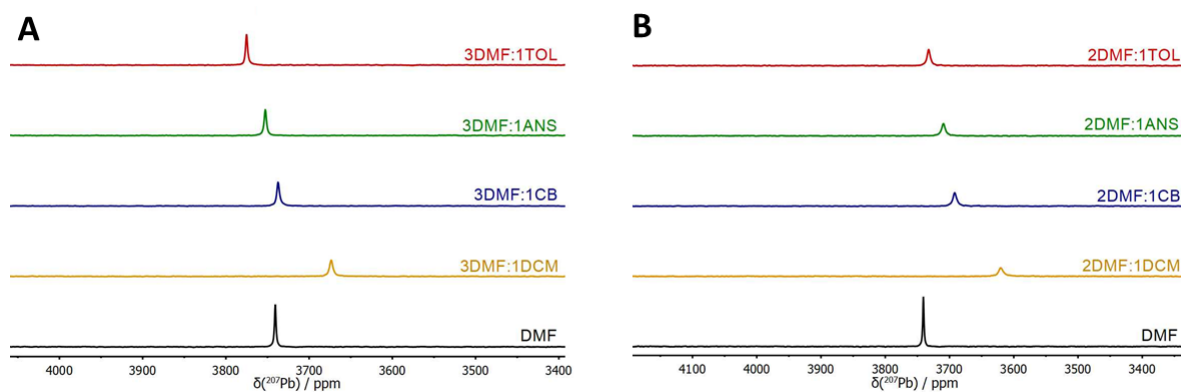

**Fig. 4** Solution-state  $^{207}\text{Pb}$ -NMR spectra of 0.075 M  $\text{PbI}_2$  and 0.8 M MAI in pure DMF and in a (A) 2:1 molar ratio and (B) 3:1 molar ratio of DMF to antisolvents with varying dielectric constants.

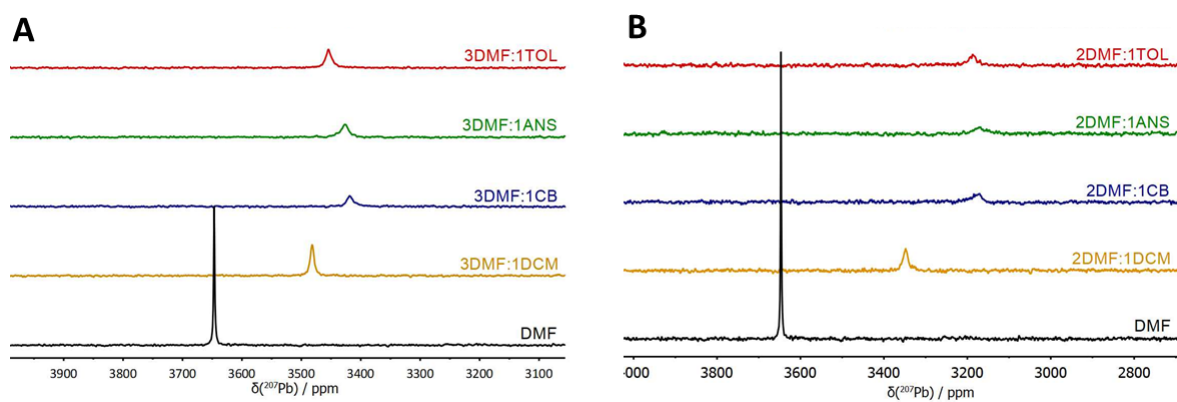

**Fig. 5** Solution-state  $^{207}\text{Pb}$ -NMR spectra of 0.075 M  $\text{PbI}_2$  and 2.3 M MAI in pure DMF and in a (A) 2:1 molar ratio and (B) 3:1 molar ratio of DMF to antisolvents with varying dielectric constants.

## 6 Fabricated Thin Films

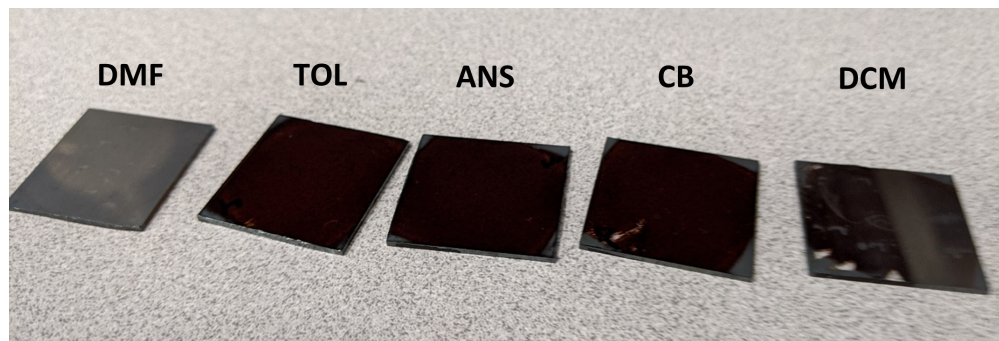

**Fig. 6** Images of thin films fabricated using 1 M  $\text{MAPbI}_3$  in DMF prepared using an antisolvent dripping method. The film denoted as DMF (leftmost image) was prepared with no antisolvent. The surfaces of the films prepared with DMF (leftmost) and DCM (rightmost) show significant dullness and roughness compared to those of the other films.

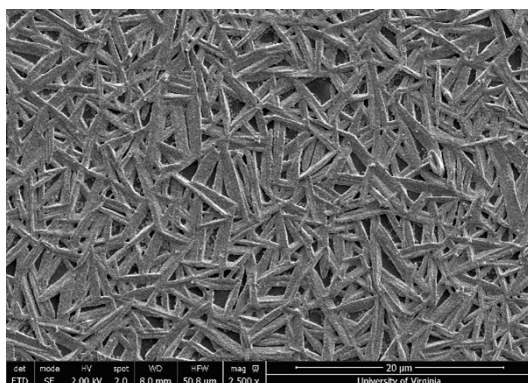

**Fig. 7** SEM image of a film fabricated using 1 M  $\text{MAPbI}_3$  in DMF with no antisolvent. The film shows a needle-like morphology with pinholes. A magnification of 2.5k was used with a scale bar of 20  $\mu\text{m}$ .

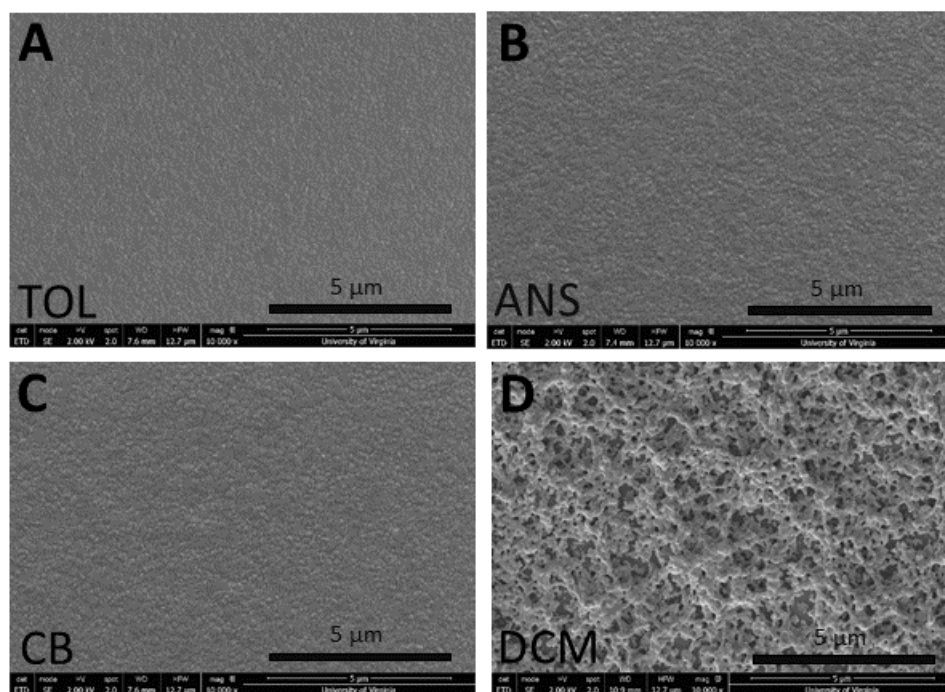

**Fig. 8** SEM images of the films fabricated with 1M MAPbI<sub>3</sub> in DMF using antisolvent dripping method with the antisolvent (A) TOL (B) ANS (C) CB and (D) DCM. 10 k magnification was used with the scale bar 5 μm.
